# Supplementary material for: Prediction of White Matter Hyperintensity in Brain MRI Using Fundus Photographs via Deep Learning
Source: MDPI journal article supplement (doi:10.3390/jcm11123309), 2022-06-09
Supplement: s1 [file s1]

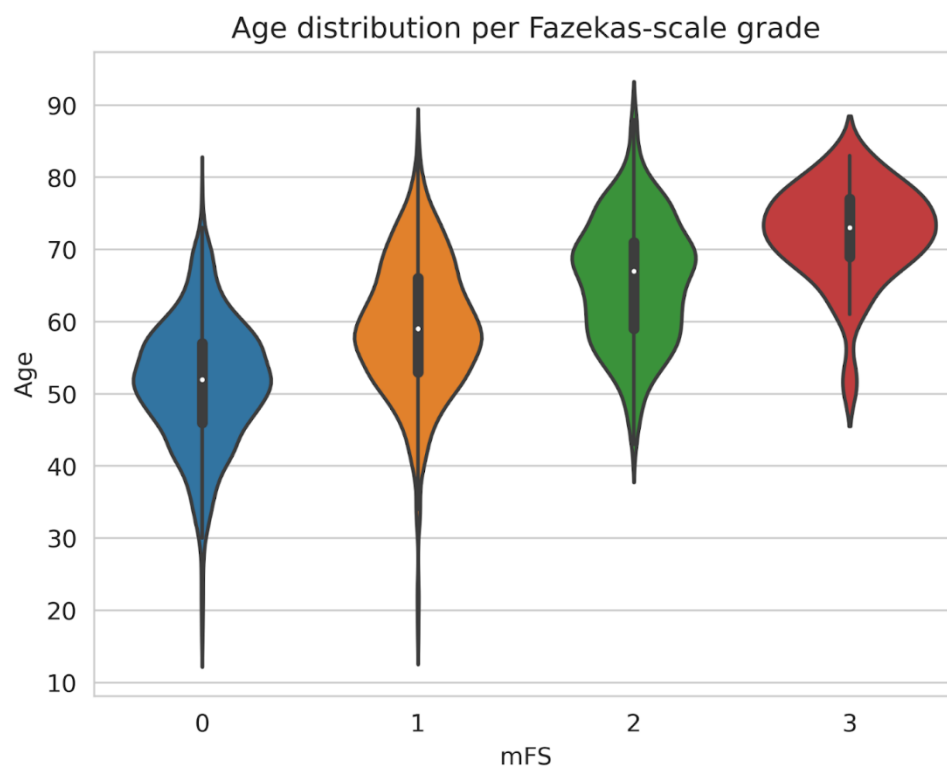

**Figure S1.** The age distribution of included subjects by modified Fazekas scale grade

**Table S1.** Assessment of modified Fazekas' score by two stroke neurologists.

| Rater 1 | Rater 2 |     |     |    | Total |
|---------|---------|-----|-----|----|-------|
|         | 0       | 1   | 2   | 3  |       |
| 0       | 894     | 113 | 0   | 0  | 1007  |
| 1       | 125     | 524 | 0   | 0  | 649   |
| 2       | 0       | 4   | 186 | 17 | 207   |
| 3       | 0       | 0   | 3   | 26 | 29    |
| Total   | 1019    | 641 | 189 | 43 | 1892  |

**Table S2.** Comparison of Age distribution of each cell in DenseNet-201 confusion matrix

| Age (years $\pm$ SD) |   | Predicted class |                |
|----------------------|---|-----------------|----------------|
|                      |   | +               | -              |
| True Class           | + | TP              | FN             |
|                      |   | 66.3 $\pm$ 7.9  | 53.2 $\pm$ 9.8 |
|                      | - | FP              | TN             |
|                      |   | 59.5 $\pm$ 5.4  | 49.2 $\pm$ 6.8 |

SD, standard deviation.

**Table S3. Prediction of the presence of WMH (binary classification) using 10-fold cross validation**

|                                          | <b>DenseNet 201</b>                |                                    | <b>EfficientNet B7</b>             |                                    |
|------------------------------------------|------------------------------------|------------------------------------|------------------------------------|------------------------------------|
|                                          | <b>AUC</b>                         | <b>Accuracy</b>                    | <b>AUC</b>                         | <b>Accuracy</b>                    |
| Fold 0                                   | 0.736                              | 0.676                              | 0.712                              | 0.646                              |
| Fold 1                                   | 0.725                              | 0.678                              | 0.690                              | 0.651                              |
| Fold 2                                   | 0.750                              | 0.672                              | 0.726                              | 0.653                              |
| Fold 3                                   | 0.750                              | 0.694                              | 0.718                              | 0.665                              |
| Fold 4                                   | 0.763                              | 0.685                              | 0.748                              | 0.691                              |
| Fold 5                                   | 0.734                              | 0.656                              | 0.723                              | 0.661                              |
| Fold 6                                   | 0.683                              | 0.661                              | 0.692                              | 0.683                              |
| Fold 7                                   | 0.769                              | 0.708                              | 0.766                              | 0.716                              |
| Fold 8                                   | 0.687                              | 0.635                              | 0.712                              | 0.665                              |
| Fold 9                                   | 0.761                              | 0.689                              | 0.756                              | 0.708                              |
| Performance average $\pm$<br>SD (95% CI) | 0.736 $\pm$ 0.030<br>(0.733-0.739) | 0.676 $\pm$ 0.021<br>(0.674-0.678) | 0.724 $\pm$ 0.026<br>(0.721-0.727) | 0.674 $\pm$ 0.024<br>(0.672-0.676) |

AUC, the area under a receiver operating characteristic ; SD, standard deviation.

**Table S4. Prediction of the presence of WMH (binary classification) using 5-fold cross validation**

|                           | <b>DenseNet 201</b> |                   | <b>EfficientNet B7</b> |                   |
|---------------------------|---------------------|-------------------|------------------------|-------------------|
|                           | <b>AUC</b>          | <b>Accuracy</b>   | <b>AUC</b>             | <b>Accuracy</b>   |
| Fold 0                    | 0.720               | 0.658             | 0.701                  | 0.638             |
| Fold 1                    | 0.746               | 0.670             | 0.729                  | 0.659             |
| Fold 2                    | 0.753               | 0.693             | 0.734                  | 0.691             |
| Fold 3                    | 0.735               | 0.687             | 0.714                  | 0.679             |
| Fold 4                    | 0.715               | 0.651             | 0.688                  | 0.646             |
| Performance average $\pm$ | 0.734 $\pm$ 0.016   | 0.672 $\pm$ 0.018 | 0.713 $\pm$ 0.019      | 0.663 $\pm$ 0.022 |
| SD (95% CI)               | (0.733-0.735)       | (0.671-0.673)     | (0.712-0.714)          | (0.661-0.665)     |

AUC, the area under a receiver operating characteristic ; SD, standard deviation.

**Table S5. Prediction of the Fazekas scale grade (3-class classification) using 10-fold cross validation**

|                  | <b>DenseNet<br/>201</b> | <b>EfficientNet<br/>B7</b> |
|------------------|-------------------------|----------------------------|
|                  | <b>Accuracy</b>         |                            |
| Fold 0           | 0.451                   | 0.385                      |
| Fold 1           | 0.440                   | 0.429                      |
| Fold 2           | 0.411                   | 0.389                      |
| Fold 3           | 0.367                   | 0.422                      |
| Fold 4           | 0.451                   | 0.396                      |
| Fold 5           | 0.286                   | 0.352                      |
| Fold 6           | 0.378                   | 0.456                      |
| Fold 7           | 0.467                   | 0.489                      |
| Fold 8           | 0.467                   | 0.333                      |
| Fold 9           | 0.429                   | 0.308                      |
| Performance      |                         |                            |
| average $\pm$ SD | 0.414 $\pm$ 0.057       | 0.396 $\pm$ 0.056          |
| (95% CI)         | 0.402-0.426             | 0.385-0.407                |

SD, standard deviation.

**Table S6. Prediction of the Fazekas scale grade (3-class classification) using 5-fold cross validation**

|                  | <b>DenseNet<br/>201</b> | <b>EfficientNet<br/>B7</b> |
|------------------|-------------------------|----------------------------|
|                  | <b>Accuracy</b>         |                            |
| Fold 0           | 0.459                   | 0.414                      |
| Fold 1           | 0.385                   | 0.396                      |
| Fold 2           | 0.354                   | 0.392                      |
| Fold 3           | 0.428                   | 0.367                      |
| Fold 4           | 0.381                   | 0.409                      |
| Performance      |                         |                            |
| average $\pm$ SD | 0.401 $\pm$ 0.042       | 0.396 $\pm$ 0.018          |
| (95% CI)         | 0.395 ~0.407            | 0.393~0.399                |

SD, standard deviation.
